# Supplementary material for: Generation of hypothalamic neural stem cell-like cells in vitro from human pluripotent stem cells
Source: PubMed Central journal article supplement (PMC10147555; doi:10.1016/j.stemcr.2023.02.006), 2023-03-23
Supplement: mmc1.pdf [file mmc1.pdf]

**Supplemental Information**

**Generation of hypothalamic neural stem cell-like cells *in vitro* from human pluripotent stem cells**

**Tsutomu Miwata, Hidetaka Suga, Yohei Kawaguchi, Mayu Sakakibara, Mayuko Kano, Shiori Taga, Mika Soen, Hajime Ozaki, Tomoyoshi Asano, Hiroo Sasaki, Takashi Miyata, Yoshinori Yasuda, Tomoko Kobayashi, Mariko Sugiyama, Takeshi Onoue, Hiroshi Takagi, Daisuke Hagiwara, Shintaro Iwama, and Hiroshi Arima**

# Figure 1S

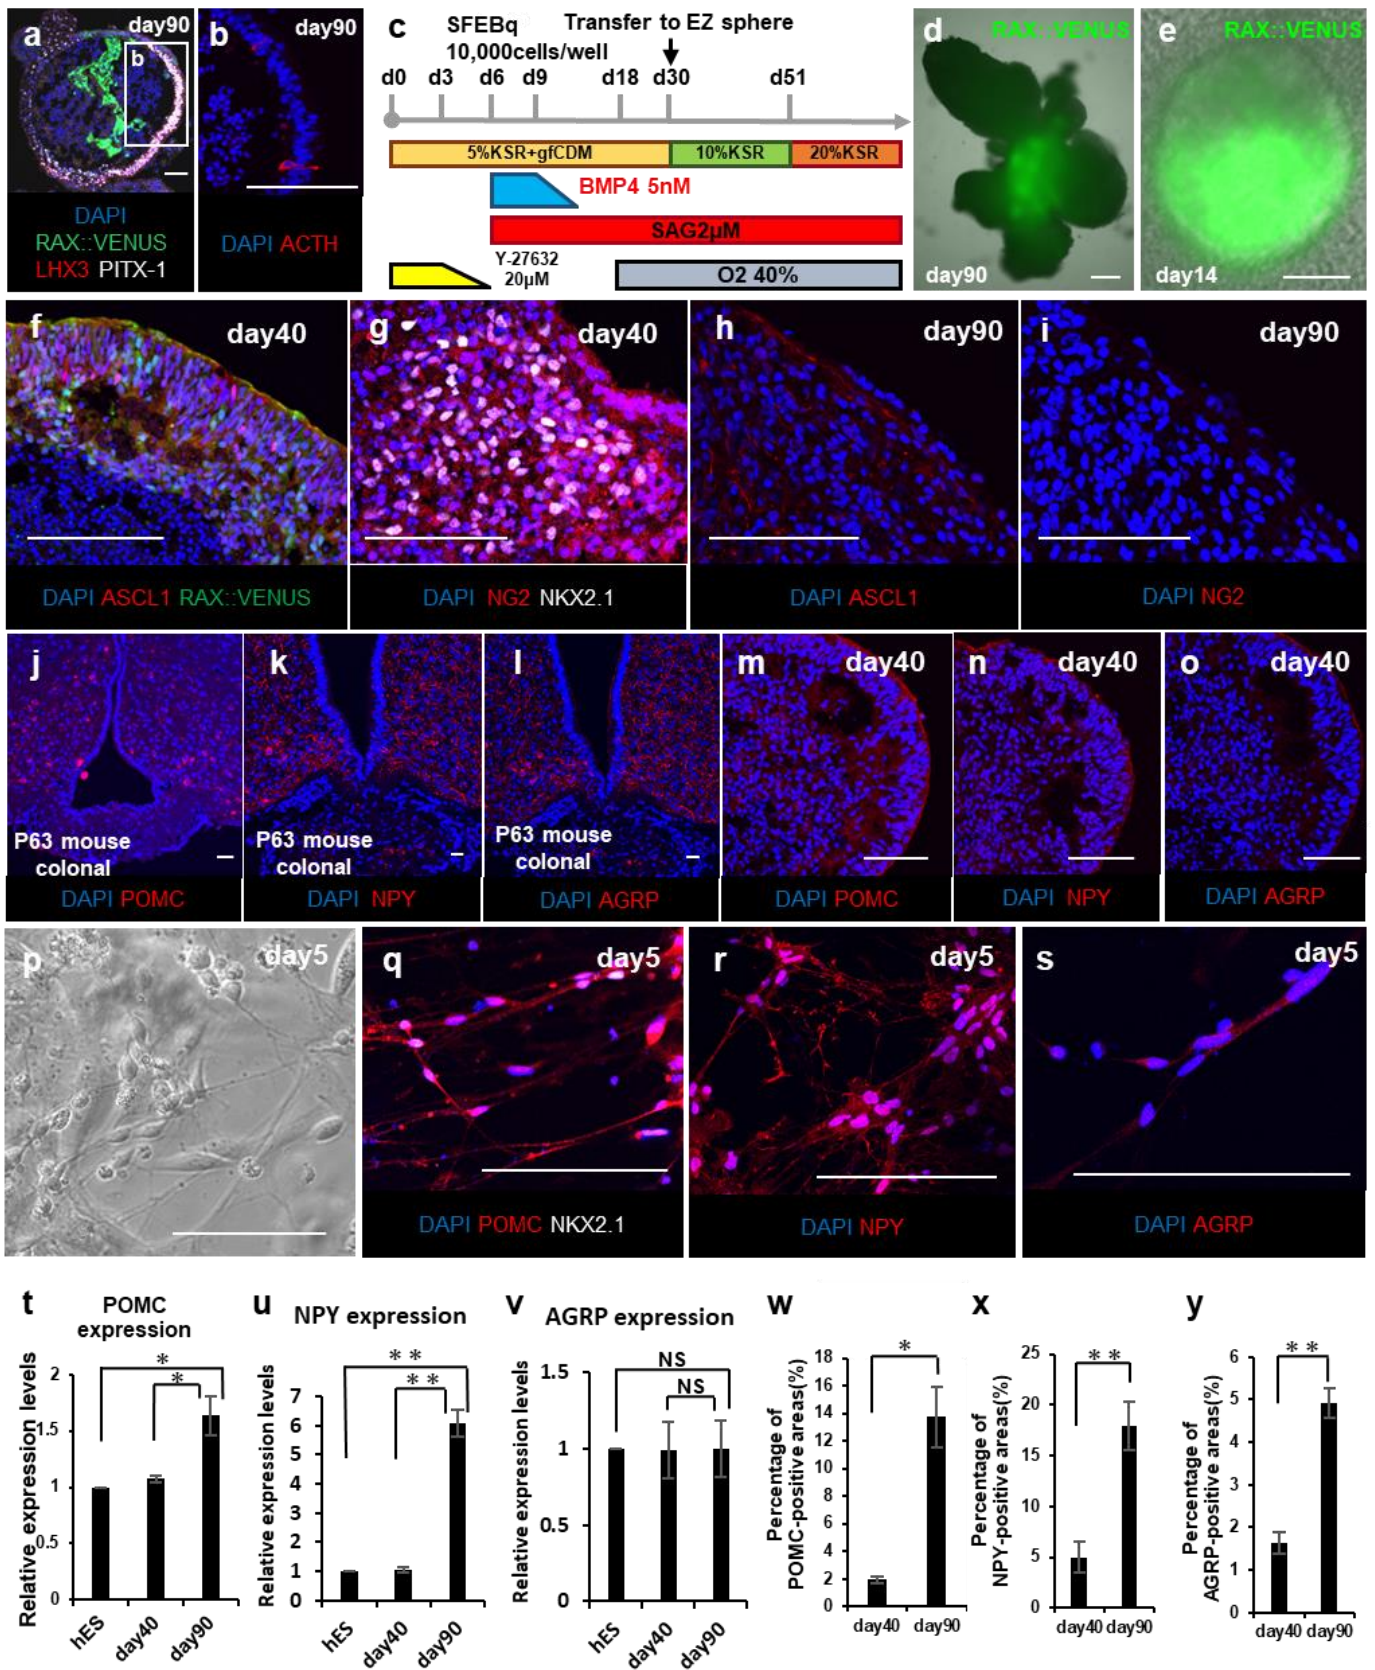

**Supplementary Figure 1 | Various properties of Human hypothalamic-pituitary organoids. Related to Figure 1.**

(a, b) Immunostaining of a day-90 hypothalamic-pituitary organoid. Two layers of RAX::VENUS (green; a) positive hypothalamic-like tissue in the interior and paired like homeodomain 1 (PITX1) (white; a), LIM Homeobox 3 (LHX3) (red; a), markers of pituitary progenitor cells, and adrenocorticotrophic hormone (ACTH) (red; b) positive oral ectoderm-like tissue in the periphery. (c) Culture protocol for hypothalamic-pituitary organoid induction under the condition that BMP4 administration was shortened to three days (d6-d9). (d) Fluorescence microscopy images of hypothalamic-pituitary organoids on day 90 under the condition of shortened BMP4. RAX::VENUS-positive areas (green; d) appear to decrease compared to the original condition. (e) Fluorescence microscopy images of RAX::VENUS (green)-positive cell masses 14 days after isolation from organoids cultured under the shortened BMP4 conditions. RAX::VENUS is expressed only in about half of the cell mass. (f-i) Immunostaining of hESC-derived hypothalamic-pituitary organoids on days 40 (f, g) and 90 (h, i) for ASCL1 (red; f, h), NG2 (red; g, i), co-expressed with RAX::VENUS (green; f) and NKX2.1 (white; g). (j-l) Immunostaining of a coronal section of a nine-week-old mouse brain near the ventral hypothalamus for POMC (red; j), NPY (red; k), and AGRP (red; l). (m-o) Immunostaining of hESC-derived hypothalamic-pituitary organoids on day 40 for POMC (red; m), NPY (red; n), and AGRP (red; o). (p) Phase-contrast microscopy image of a neuron differentiated from hESC-derived hypothalamic-pituitary organoids on day 90. (q-s) Immunostaining of neuronal cells differentiated from hESC-derived hypothalamic-pituitary organoids on day 90. The expression of ventral hypothalamic neuron markers POMC (red; q), NPY (red; r) and AGRP (red; s) were observed. (t-v) Expression of POMC (t), NPY (u) and AGRP (v) on undifferentiated hESCs, hESC-derived hypothalamic-pituitary organoids on days 40 and 90 (qPCR; n = 3 independent experiments). (w-y) Area of POMC (w), NPY (x), and AGRP (y) expressed in the largest section of the hypothalamic-pituitary organoids using cellSens imaging software (Olympus) (n = 3 independent experiments). Values shown on the graphs represent the means  $\pm$  S.E.M. \*P<0.05, \*\*P<0.01. Scale bars, 100  $\mu$ m (a, b, d-s).

# Figure 2S

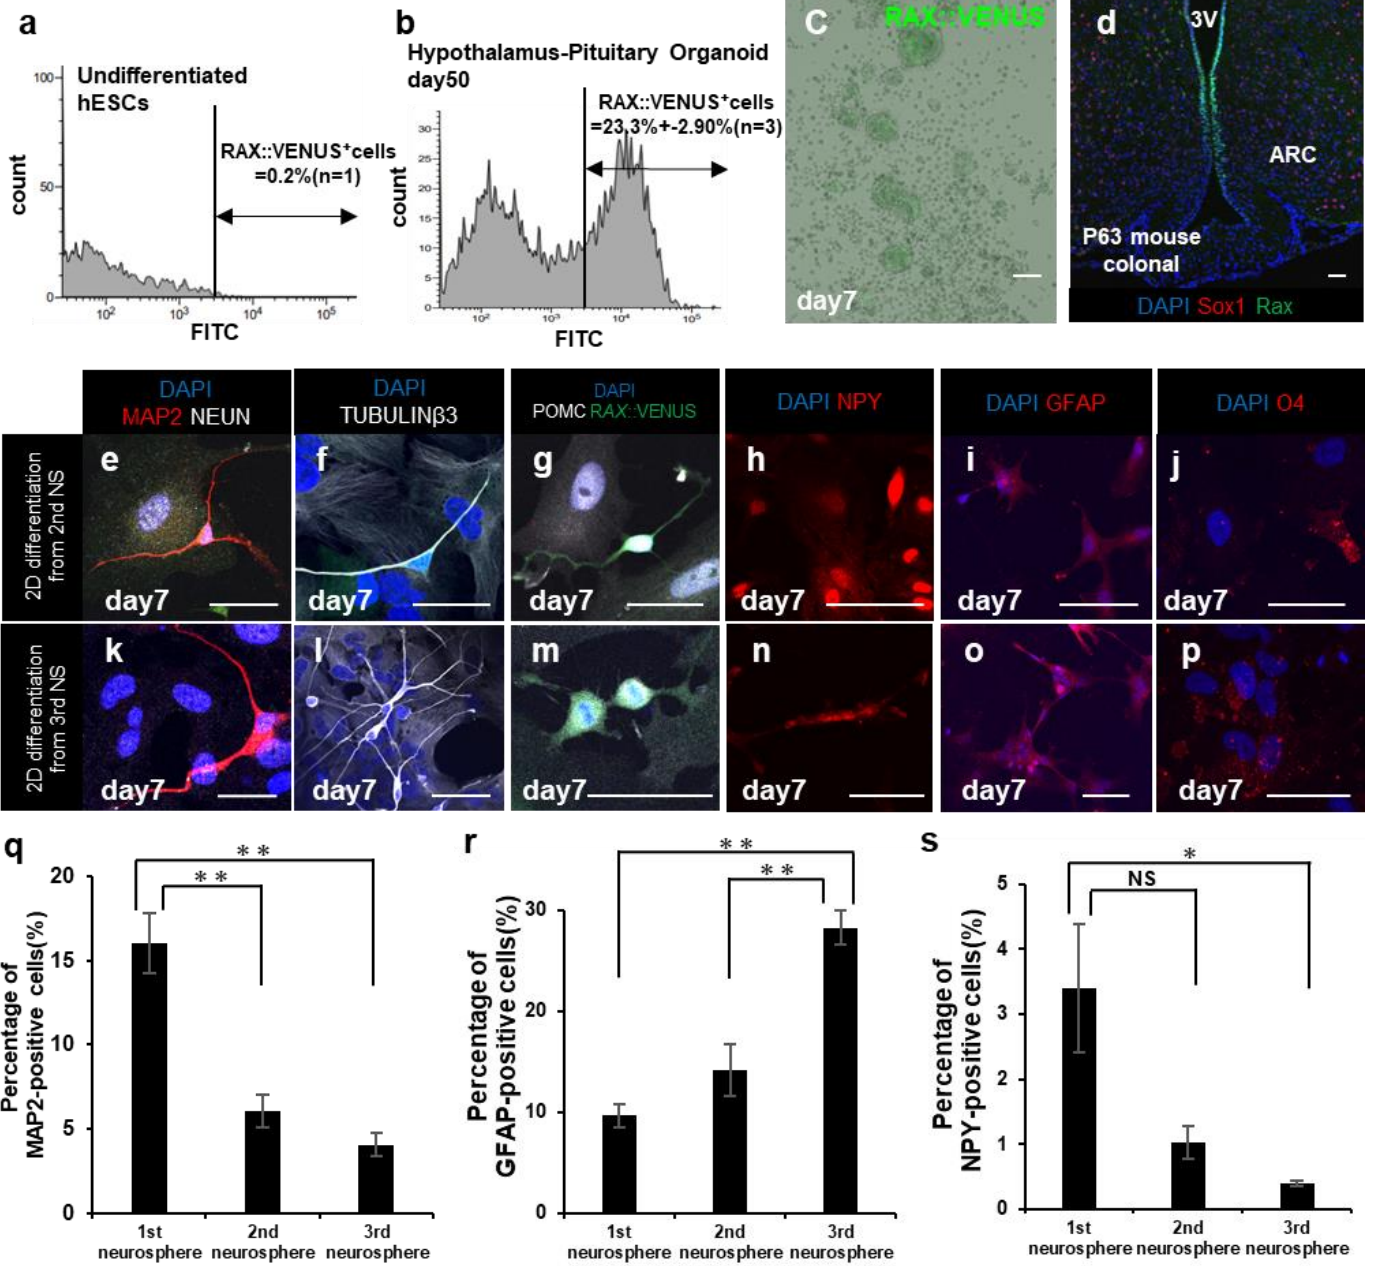

**Supplementary Figure 2 | *In vitro* characteristics of Sorted RAX::Venus-positive cells Related to Figure 2 and Figure 3.**

(a) Histogram of fluorescein isothiocyanate (FITC) fluorescence analysis of undifferentiated hESCs as a negative control. (b) Histogram of RAX::VENUS-positive and negative cells in day-50 hypothalamic-pituitary organoids. (c) Fluorescence microscopy images of RAX::VENUS (green)-positive cells isolated from day-90 hypothalamic-pituitary organoids suspended in ultra-low attachment 24-well plates. After seven days, a small number of neurospheres 100-200  $\mu\text{m}$  in diameter were formed, but they did not grow any larger. (d) Immunostaining of a coronal section of a nine-week-old mouse brain near the ventral hypothalamus. Sox1 (red) is not expressed in the Rax (green)-positive tanycytes. (e-p) Immunostaining of neurons and glia differentiated from the neurospheres after multiple passaging. Differentiated cells from the second and third neurospheres expressed the mature neuron markers MAP2 (red; e, k), NEUN (white; e, k), and TUBULIN $\beta$ 3 (white: f, l), the ventral hypothalamic neuron markers POMC (white; g, m) and NPY (red; h, n), an astrocyte marker GFAP (red; i, o), and an oligodendrocyte marker O4 (red; j, p). (q-s) Rates of MAP2-positive cells (q), GFAP-positive cells (r) and NPY-positive cells (s) per each well (total  $10^5$  cells). Values shown on the graphs represent the means  $\pm$  S.E.M n=3 independent experiments. \*P<0.05, \*\*P<0.01. Scale bars, 50  $\mu\text{m}$  (c-p).

## Figure3S

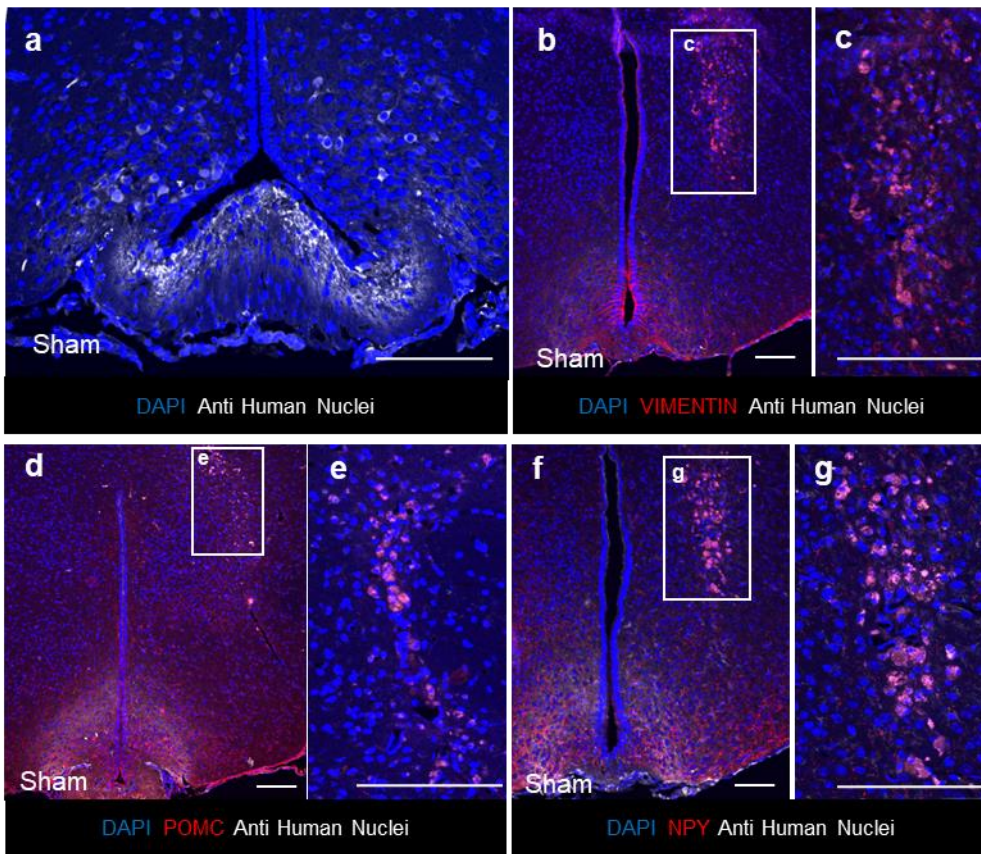

**Supplementary Figure 3 | In sham group, anti-human nuclear antibodies and neuropeptides show nonspecific expression and scarring changes. Related to Figure 4.**

(a-g) Immunostaining of a coronal section of a nine-week-old sham group mouse brain near the ventral hypothalamus for anti-human nuclear antibodies (white; a-g): VIMENTIN (red; b, c), POMC (red; d, e) and NPY (red; f, g). Scale bars, 100  $\mu$ m (a-g).

## Figure4S

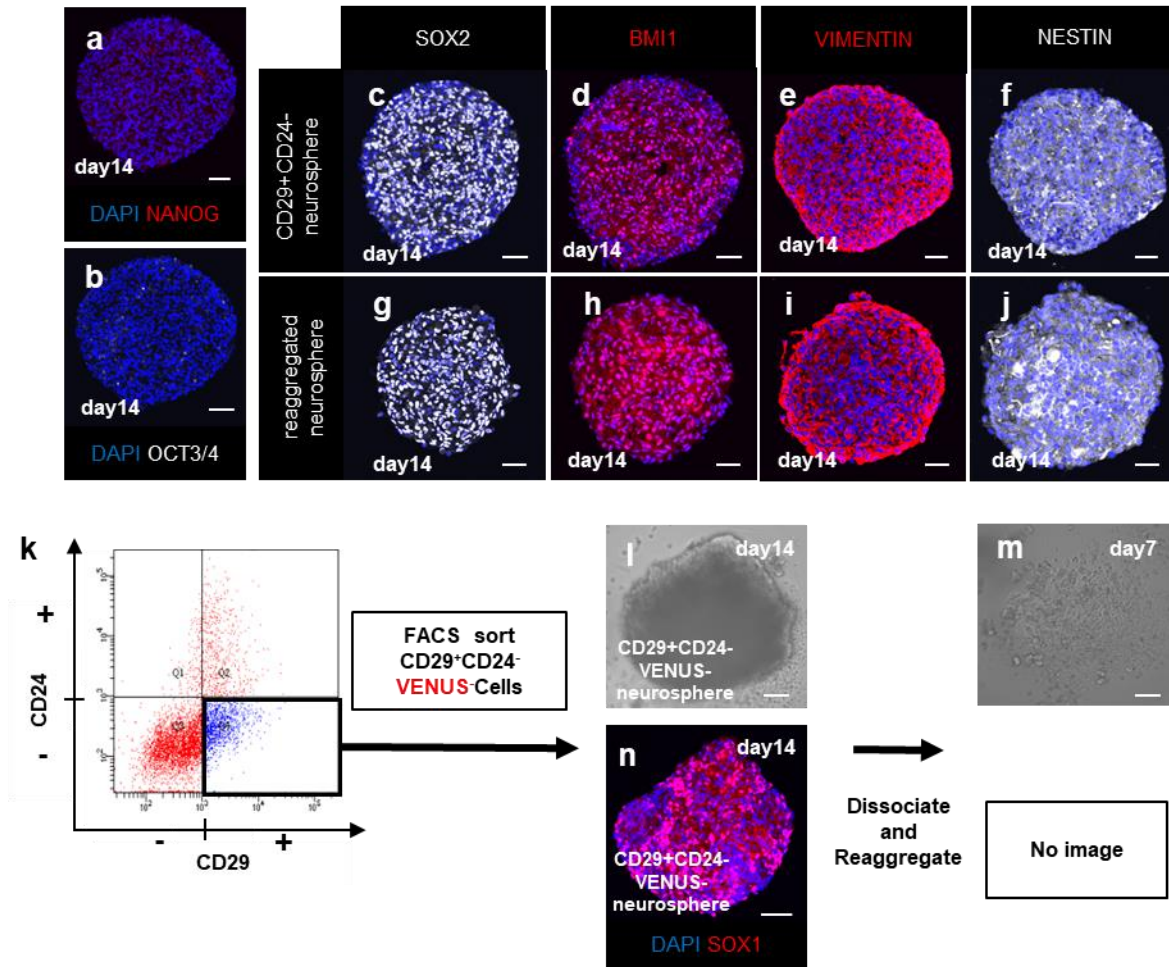

**Supplementary Figure 4 | CD29-positive and CD24-negative neurospheres and the reaggregated neurospheres have the properties of neural stem cells but impurities have low aggregation capacity. Related to Figure 5.**

(a, b) Immunostaining of the CD29-positive and CD24-negative neurospheres for NANOG (red; a) and OCT3/4 (red; b), undifferentiated human ES cell markers. (c-j) Immunostaining of CD29-positive and CD24-negative neurospheres and reaggregated neurospheres for SOX2 (white; c, g), BMI1 (red; d, h), VIMENTIN (red; e, i), NESTIN (white; f, j), neural stem cell markers. (k) Fluorescence analysis of CD29-positive and CD24-negative cells of human hypothalamic-pituitary organoids. (l) Neurospheres formed by the floating culture of CD29-positive, CD24-negative and RAX::VENUS-negative cells for 14 days (CD29-positive, CD24-negative and RAX::VENUS-negative neurospheres). (m) Microscopy images of cells after one passage from CD29-positive, CD24-negative and RAX::VENUS-negative neurospheres. (n) Immunostaining of CD29-positive, CD24-negative and RAX::VENUS-negative neurospheres for SOX1 (red; n). Scale bars, 50  $\mu$ m (a-j, l-n).

## Figure5S

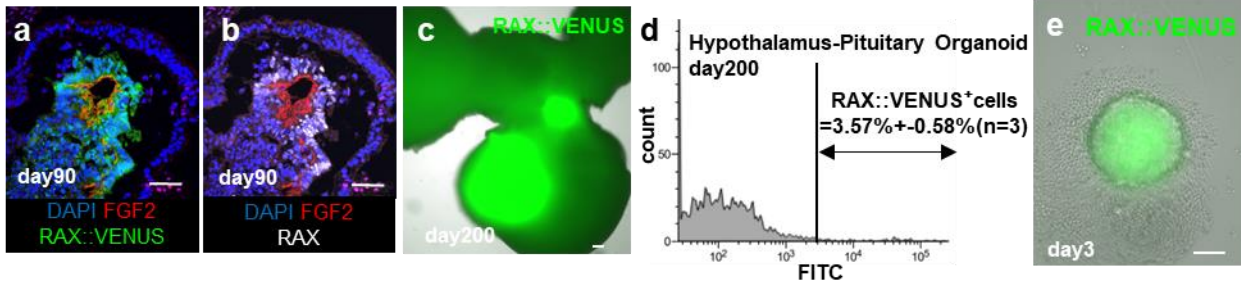

### Supplementary Figure 5 | The hypothalamic neural stem cell-like cell niche might exist inside the hypothalamic-pituitary organoids. Related to Discussion.

(a, b) Immunostaining of a day-90 hypothalamic-pituitary organoid. FGF2 (red; a, b) was expressed along the inner cavities of RAX::VENUS (green; a)-positive and RAX (white; b)-positive cells. (c) Fluorescence microscopy images of hypothalamic-pituitary organoids on day 200. RAX::VENUS (green)-positive cells still existed inside the hypothalamic-pituitary organoids. (d) Histogram of RAX::VENUS-positive and negative cells in day-200 hypothalamic-pituitary organoids. (e) Fluorescence microscopy images of the neurospheres composed of RAX::VENUS-positive cells (green) isolated from day-200 hypothalamic-pituitary organoid. Scale bars, 50  $\mu$ m (a-c, e).



## Supplemental Experimental Procedures

### Maintenance and differentiation culture of hESCs

The hESCs were used according to the hESC research guidelines of the Japanese government (Nagoya University ES-0001). For the experiments shown, we used the VA22-N37 cell line, which is a RAX::VENUS reporter hESC line established based on KhES-1 (KUIMSe001-A), a biological replicate (Nakano et al., 2012).

Undifferentiated hESCs were maintained on a feeder layer of mouse embryonic fibroblasts inactivated by mitomycin C treatment in DMEM/F-12 (Sigma) supplemented with 20% (vol/vol) KSR (Invitrogen), 2 mM glutamine, 0.1 mM nonessential amino acids (Invitrogen), 5 ng mL<sup>-1</sup> recombinant human basic FGF (Wako) and 0.1 mM 2-mercaptoethanol under 2% CO<sub>2</sub>. For passaging, hESC colonies were detached and recovered *en bloc* from culture dishes by treatment with 0.25% (w/v) trypsin and 1 mg mL<sup>-1</sup> collagenase IV in phosphate-buffered saline (PBS) containing 20% (v/v) KSR and 1 mM CaCl<sub>2</sub> at 37 °C for 10 min. The detached hESC clumps were broken into smaller pieces using a pipette. Passages were performed at a 1:5 split ratio every four days.

For SFEBq culture, hESCs were dissociated into single cells using TrypLE Express (Invitrogen) containing 0.05 mg mL<sup>-1</sup> DNase I (USA) and 10 μM Y-27632. They quickly aggregated in low-cell-adhesion 96-well plates with V-bottomed conical wells (Sumilon PrimeSurface plate; Sumitomo Bakelite) in differentiation medium (10,000 cells per well, 100 μL) containing 20 μM Y-27632. Differentiation medium (gfCDM) was supplemented with 5% KSR. The gfCDM comprised Iscove's modified Dulbecco medium/Ham's F12 1:1, 1% chemically defined lipid concentrate, monothioglycerol (450 μM), and 5 mg mL<sup>-1</sup> purified bovine serum albumin (>99% purified by crystallization; Sigma). The SFEBq culture was initiated on day zero. Next, 100 μL of gfCDM per well was added to each well on day 3. From days 6 to 30, the medium was renewed every three days. SAG (Enzo Life Sciences) and recombinant human BMP4 (R&D Systems) were added to the culture medium to reach 2 and 5 nM, respectively, from day 6. BMP4 concentrations were diluted by half-volume changes in BMP4-free medium every third day after day 18. From day 18, the aggregates were cultured under high-O<sub>2</sub> conditions (40%). After culturing in a 96-well plate for 30 days, aggregates were transferred to a 10 cm Petri dish for suspension culture in gfCDM supplemented with 10% KSR and 2 μM SAG on day 30. From day 30, half of the medium was used every three days. The concentration of KSR was increased (final 20% (vol/vol)) from day 50.

### Quantitative PCR

Quantitative PCR was performed on ten aggregates per sample. RNAs were purified using the RNeasy kit after treatment with DNase. Quantitative PCR was performed using Power SYBR Green PCR Master Mix and analyzed with the MX3005P system. Data were normalized against the corresponding levels of GAPDH mRNA.

Primers used were as follows:

Forward primer for GAPDH: 5'-GAGTCAACGGATTTGGTCGT-3'

Reverse primer for GAPDH: 5'-TTGATTTTTGGAGGGATCTCCG-3'

Forward primer for POMC: 5'-GAAGATGCCGAGATCGTGCT-3'

Reverse primer for POMC: 5'-ACGTA CTCCGGGGTTCTC-3'

Forward primer for NPY: 5'-GCTGCGACACTACATCAACCTC-3'

Reverse primer for NPY: 5'-ACACGATGAAATATGGGCTGAA -3'

Forward primer for AGRP: 5'-GGATCTGTTGCAGGAGGCTCAG-3'

Reverse primer for AGRP: 5'-TGAAGAAGCGGCAGTAGCACGT-3'

## **Immunohistochemistry**

Neurospheres, organoids, and mouse brains were fixed in 4% paraformaldehyde (PFA) for 5-20 min. The cells on PDL-coated glass coverslips were fixed with 2% PFA for 10 min, followed by 4% PFA for 15 min. They were immersed in 20% sucrose and embedded in optimal cutting temperature compound (4583; Sakura Finetek, Tokyo, Japan). They were cut into 10  $\mu$ m thick sections using a cryostat. Immunohistochemistry was performed as described below. The sections (tissue or cells) were washed three times (15 min per wash) in 0.3% Triton X-100/PBS for permeabilization and then washed with PBS three times (15 min per wash). Subsequently, the sections were incubated in 2% (w/v) dry skimmed milk/PBS for 1 h at room temperature (RT) for blocking. The sections were incubated overnight at 4 °C with primary antibodies diluted in 2% dry skimmed milk/PBS. The next day, the sections were washed three times (15 min each wash) with 0.05% Tween 20/PBS and incubated with secondary antibodies diluted in 2% dry skimmed milk/PBS for 2 h at RT. Next, 4,6-diamidino-2-phenylindole (DAPI; D523; Dojindo, Kumamoto, Japan) was added to visualize cell nuclei. Subsequently, the sections were washed three times (15 min each wash) in 0.05% Tween 20/PBS and mounted in Slow Fade™ Diamond (S36972; Thermo Fisher Scientific). ProLong™ Diamond (P36970; Thermo Fisher Scientific) was used to stain cells on PDL-coated glass coverslips. The primary antibodies were used at the following dilutions:

ACTH (10C-CR1096M1; 1:200; Fitzgerald; RRID: AB\_1282437).

AGRP (GT15023; Goat; 1:250; Neuromics; RRID: AB\_2687600).

Anti-human nuclei (MAB4383; mouse; 1:1000; Millipore; RRID: AB\_827439).

ASCL1 (ab74065; rabbit; 1:200; abcam; RRID: AB\_1859937)

BLBP (ab32423; rabbit; 1:100; abcam, Cambridge, UK; RRID: AB\_880078).

BMI1 (ab14389; mouse; 1:200; abcam; RRID: AB\_2065390).

BrdU (sc-32323; mouse; 1:150; Santa Cruz Biotechnology, Dallas, TX, USA; RRID: AB\_626766).

CD24 (ab202073; rabbit; 1:100; abcam; RRID: AB\_2904220).

CD29 (integrin $\beta$ 1) (ab24693; mouse; 1:200; abcam; RRID: AB\_448230).

COL23A1 (MA5-24188; mouse; 1:50; Thermo Fisher Scientific; RRID: AB\_2606945)

COL25A1 (MBS-2561599; rabbit; 1:100; MyBioSource; RRID: AB\_2927653)

FGF2 (sc-365105; mouse; 1:100; Santa Cruz Biotechnology, Dallas, TX, USA; RRID: AB\_10715107).

GFAP (AB5804; rabbit, 1:400; EMD Millipore; RRID: AB\_2109645).

Ki67 (NCL-Ki67p; rabbit, 1:500; Novocastra; Nussloch, Germany; RRID: AB\_442102).

LHX2 (GTX129241; rabbit; 1:200; Genetex, Irvine, CA; RRID: AB\_2783558).

LHX3 (AS4002S; rabbit; 1:3000; costom; RRID: AB\_2895165),

MAP2 (AB5392; chicken; 1:10,000; Abcam; RRID: AB\_2138153).

NANOG (RCAB003P; rabbit; 1:500; Reprocell; RRID: AB\_2714012).

NESTIN (PRB315C; rabbit; 1:400; BioLegend, San Diego, CA; RRID: AB\_10094393).

NEUN (MAB377; mouse, 1:100; EMD Millipore; RRID: AB\_2298772).

NG2 (PA5-78556; rabbit; 1:500; Thermo Fisher Scientific; RRID: AB\_2736211)

NKX2.1 (180221; mouse; 1:200; Zymed (Thermo Fisher Scientific); RRID: AB\_86728).

Neuropeptide Y (NPY; 11976; rabbit; 1:3000; Cell Signaling Technology; RRID: AB\_2716286).  
NR5A1(SF-1) (PP-N1655-0C; mouse; 1:200; Perseus Proteomics; RRID: AB\_2904221).  
O4 (MAB345; mouse, 1:200; EMD Millipore; RRID: AB\_11213138).  
OCT3/4(sc-5279; mouse; 1:100; Santacruz; RRID: AB\_628051).  
PAX6 (PRB-278P; rabbit: 1:250; BioLegend; RRID: AB\_291612).  
PITX1 (MS1568GS; guinea pig; 1:2000; custom; RRID: AB\_2895166).  
POMC (H02930; rabbit, 1:400; Phoenix Pharmaceuticals, Burlingame, CA; RRID: AB\_2307442).  
RAX (ACG077; guinea pig; 1:10000; custom; RRID: AB\_2783560).  
Rax (M229; guinea pig; 1:2000 (for tissue 1:500); Takara, Shiga, Japan; RRID: AB\_2783559).  
SOX1 (4194S; rabbit; 1:200; Cell Signaling Technology; RRID: AB\_1904140).  
SOX2 (GT15098; goat; 1:800 (for tissue 1:200); Neuromics, Edina, MN; RRID: AB\_1623028).  
TUBULIN $\beta$ 3 (MMS435P; mouse; 1:10,000; BioLegend; RRID: AB\_2313773).  
VIMENTIN (AB5733; chicken; 1:2000 (for tissue 1:1000); EMD Millipore; RRID: AB\_11212377).

### **Cell counting method for SOX1 positive cells**

Neurospheres were sectioned at 10  $\mu$ m intervals, and the section with the longest diameter was selected. Fluorescence immunostaining was performed on the sections, and the number of DAPI-positive cells and SOX1-positive cells were counted visually.

### **Supplemental Reference**

Nakano, T., Ando, S., Takata, N., Kawada, M., Muguruma, K., Sekiguchi, K., Saito, K., Yonemura, S., Eiraku, M., and Sasai, Y. (2012). Self-formation of optic cups and storable stratified neural retina from human ESCs. *Cell Stem Cell* 10, 771–785. [10.1016/j.stem.2012.05.009](https://doi.org/10.1016/j.stem.2012.05.009).
